# Supplementary material
Source: Research Square preprint supplement (doi:10.21203/rs.3.rs-8853584/v1)
Supplement: Supplementary file 1 [file afc43379792b53a134334de4.docx]

**Autotaxin negatively regulates parathyroid hormone-induced osteogenesis through autocrine inhibition of β-catenin signaling.**

**Running title:** ATX inhibits PTH bone anabolism via Wnt/b-Cat pathway

**Authors:** Irma Machuca-Gayeta*, Mélanie Alice Legranda*, Gwénaëlle Jayatb, Léa Demesmaya, Candice Internicolaa, Lamia Bouazzaa, Candide Aliolia, Agnes Linglartc, Fabienne Courya, Justine Bacchettaa, Sylvain Provotb, Martine Cohen-Solalb, Eric Hayb$, Olivier Peyruchauda$&.

**Affiliations :**

a Universite Claude Bernard Lyon 1, INSERM, UMR 1033, LYOS, 69372, Lyon, France.

b Universite Paris Cité, INSERM UMR1132, BIOSCAR, 75475 Paris, France

c Universite Paris-Saclay, INSERM U1185, AP-HP, DMU SEA, Endocrinology and Diabetes for Children, Reference Center for Rare Diseases of the Calcium and Phosphate Metabolism, OSCAR filière, EndoRare, and BOND ERN, Bicêtre Hospital, Le Kremlin-Bicêtre, 94276 France.

* Researchers contributed equally to the work.

$ Researchers contributed equally to the work.

& To whom correspondence should be addressed: Dr Olivier Peyruchaud

INSERM UMR 1033, Faculté de médecine Lyon Est, domaine Laennec, rue Guillaume Paradin, 69372 Lyon cedex 08, France. Tel: +33 4 78 77 86 72.

E-mail: olivier.peyruchaud@inserm.fr

This Supplementary Materials file includes:

Supplementary Figs. 1 to 3 (Pages 2-5)

**Supplementary Fig. 1: Post-natal deletion of *Enpp2* in osteoblastic lineage cells does not impact bone mineral density (BMD), body size, body weight, BV/TV and cortical thickness.**

**(A-F)** Female mice parameters from 4 weeks to 24 weeks of age. **A)** Representative photographs of 24week old CTRL and ObDATX mice showing no visual differences. **B)** Cortical Bone Mineral Density (BMD) curves for the two groups of mice CTRL n=5 and ObDATX n=5, each time point was assessed every week by *in vivo* tibia microcomputed tomography over 24 weeks for each individual. Values are reported as mean +/- SD. No significant differences in mineral content were observed using Two-way ANOVA and Sikáb multiple parameter tests. **(C, D)** Growth parameters are reported as **C)** body size and **D)** body weight curves, respectively for the same two groups of mice each time point monitored every week over 24 weeks. Values are reported as mean +/- SD. No significant differences in growth parameters were observed using Two-way ANOVA and Sikáb multiple parameter tests indicating that *Enpp2* post-natal deletion in osteoblasts do not affect growth. **(E, F)** Bone mass acquisition was monitored for each female from the two groups along 24 weeks by *in vivo* tibia microcomputed tomography. **E)** Trabecular bone volume (BV/TV) and **F)** Tibia cortical thickness were monitored similarly than in b) and reported values are mean+/-SD showing overlapping curves for the two groups of mice. No significant differences in bone mass parameters were observed using Two-way ANOVA and Sikáb multiple parameter tests indicating that *Enpp2* post-natal deletion in osteoblasts do not affect bone mass acquisition. **(G-K)** Male mice parameters from 4 weeks to 20 weeks of age. **G)** Cortical Bone Mineral Density (BMD) curves for the two groups of mice CTRL n=3 and ObDATX n=3, each time point was assessed every week by *in vivo* tibia microcomputed tomography over 20 weeks for each individual. Values are reported as mean +/- SD. No significant differences in mineral content were observed using Two-way ANOVA and Sikáb multiple parameter tests. **(H, I)** Growth parameters are reported as **H)** body size and **I)** body weight curves, respectively for the same two groups of mice each time point monitored every week over 20 weeks. Values are reported as mean +/- SD. No significant differences in growth parameters were observed using Two-way ANOVA and Sikáb multiple parameter tests indicating that *Enpp2* post-natal deletion in osteoblasts in male mice do not affect growth. **(J, K)** Bone mass acquisition was monitored for each male from the two groups along 20 weeks by *in vivo* tibia microcomputed tomography. **j)** Trabecular bone volume (BV/TV) and **K)** Tibia cortical thickness were monitored similarly than in **g)** and reported values are mean+/-SD. No significant differences in bone mass parameters were observed using Two-way ANOVA and Sikáb multiple parameter tests indicating that *Enpp2* post-natal deletion in osteoblast do not affect bone mass acquisition in male mice.

**Supplementary Fig. 2: Post-natal deletion of *Enpp2* in osteoblastic lineage cells enhances early bone mass acquition induced by PTH.**

Five week old female mice CRTL (n=9) and ObDATX (n= 10) were treated with PTH1-34 80µg/kg/daily for 3 weeks and followed by µCT. **A)** Representative micrographs of frontal tibia sections and B**)** representative cross sections extracted form 3D reconstructed µCT bone volumes (yellow double arrowheads) before (week 0) and after PTH treatment (week 1, 2 and 3). Increased bone mass is visible after 1 week that further increased after 2 weeks, reaching a maximal density after 3 weeks of treatment for the two groups of mice. **C)** Trabecular BV/TV values were quantified by µCT. BV/TV curves showed higher increase in bone mass acquisition in ObDATX mice compared to CRTL mice after 1 week of PTH treatment reaching similar maximal values at weeks 2. Values are mean +/- SD and analyzed by Two-way ANOVA and Sikáb multiple parameter tests.

**Supplementary Fig. 3: *In vitro* pharmacological inhibition of ATX enhanced osteoblastogenesis.**

Amplified MSCs 6.104 cells/well were seeded on a 48 wells plate with osteogenic medium for 7 days. Intermittent PTH1-34 (10nM) was added or not to cell cultures every day during 4 hours then removed, and osteogenic media was replaced. All osteogenic media changes were similarly carried out in control wells and supplemented or not when specified with ATX inhibitor BMP22 (10nM). The plates were fixed with PFA (4%) at D7 and columns from the same plate were either stained for Alkaline phosphatase (blue) to evaluate osteoblast activity or alizarin red S 2% solution for mineral content with. Representative micrographs taken at Day 7 of cell cultures stained for **A)** Alkaline phosphatase and **C)** mineralization. **B)** quantification of alkaline phosphatase and **D)** alizarin staining by calculating the integrated intensity in every binary image of the wells using image J. Values represent the mean ± SD of three biological replicates of one experiment assessed by One-way ANOVA and Turkey’s multiple comparison tests. *In vitro* intermittent PTH or BMPP22 treatment showed significant increased staining indicating enhanced osteoblastic activity.
